# Supplementary material
Source: PubMed Central journal article supplement (PMC7125526)
Supplement: mmc1.pdf [file mmc1.pdf]

**Supplemental Information**

Si et al., “Intranasal delivery of adjuvant-free peptide nanofibers elicits resident CD8<sup>+</sup> T-cell responses”

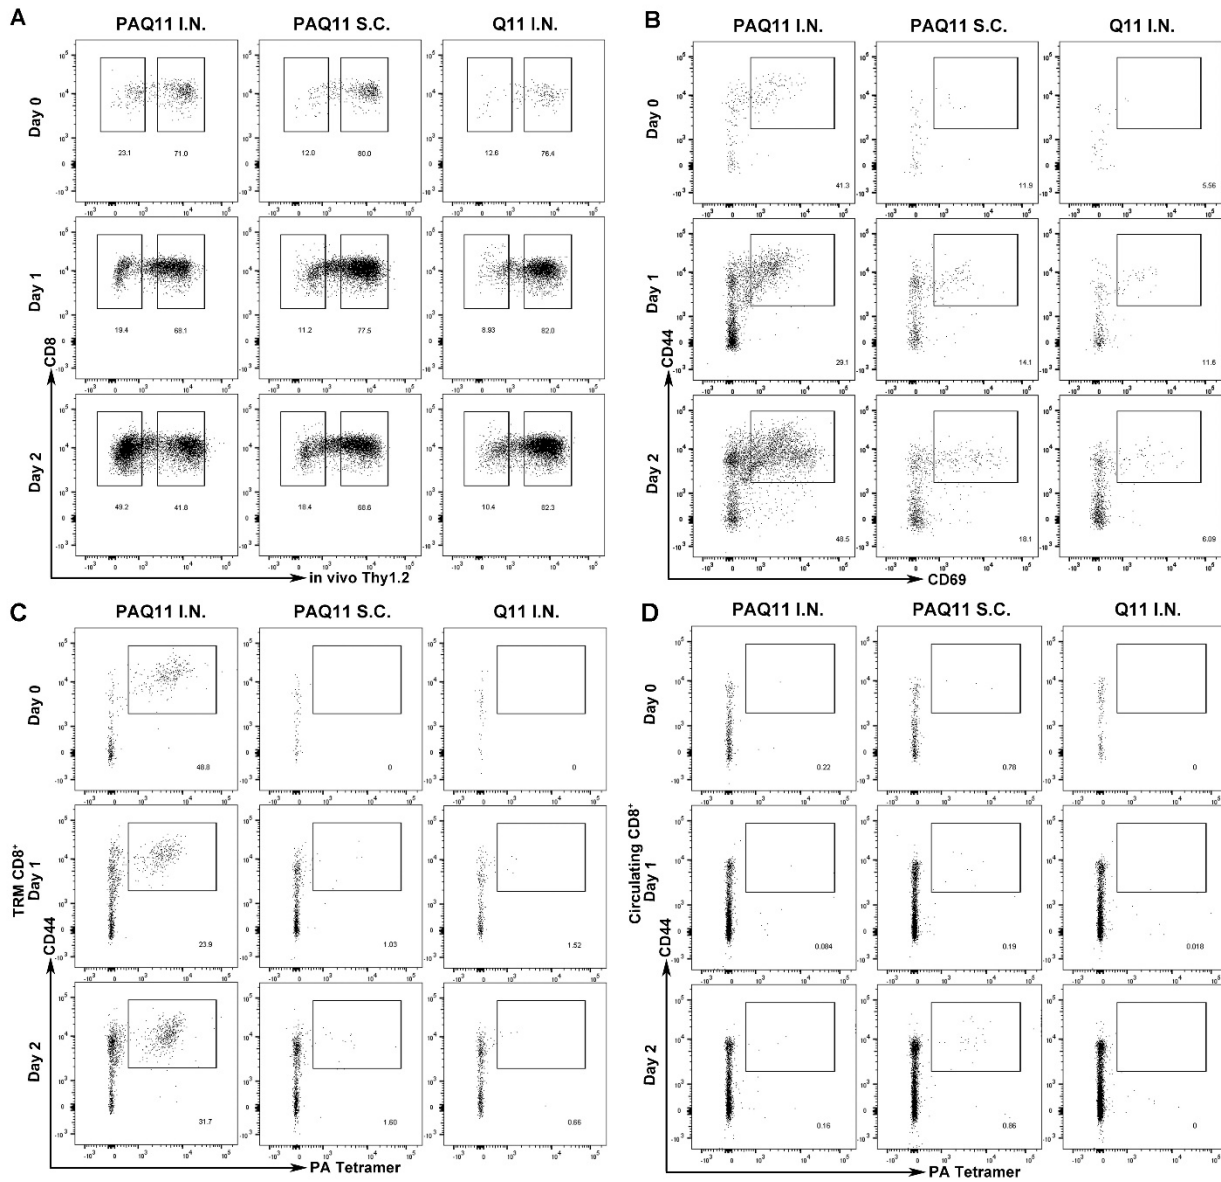

**Figure S1.** (A) Representative flow cytometry plots displaying T<sub>RM</sub> CD8<sup>+</sup> T cells or circulating CD8<sup>+</sup> T cells. (B) Representative flow cytometry plots displaying T<sub>RM</sub> marker CD69 expression of T<sub>RM</sub> CD8<sup>+</sup> T cells. (C) Representative flow cytometry plots displaying lung T<sub>RM</sub> PA-specific CD8<sup>+</sup> T cells. (D) Representative flow cytometry plots displaying circulating PA-specific CD8<sup>+</sup> T cells.
